# Supplementary material for: Regular exercise and the trajectory of health-related quality of life among Taiwanese adults: a cohort study analysis 2006–2014
Source: Springer Nature journal article supplement (doi:10.1186/s12889-019-7662-8), 2019-10-23
Supplement: MOESM2 [file 17303294]

**Additional file 2** Trajectories of HRQOL (i.e., mental scores) by regular exercise and covariates (n = 6182 persons, 16281 observations)

| Covariates                          | Mental scores                |                           |                              |                              |                           |
|-------------------------------------|------------------------------|---------------------------|------------------------------|------------------------------|---------------------------|
|                                     | VT<br>(n=5961)               | SF<br>(n=5956)            | RE<br>(n=5960)               | MH<br>(n=5960)               | MCS<br>(n=5922)           |
| <i>Fixed effects</i>                |                              |                           |                              |                              |                           |
| For intercept                       |                              |                           |                              |                              |                           |
| Intercept                           | 59.75***<br>(56.18~63.32)    | 88.54***<br>(85.27~91.81) | 86.89***<br>(80.40~93.39)    | 66.05***<br>(62.80~69.30)    | 44.51***<br>(42.80~46.21) |
| Gender (female) <sup>¶</sup>        | -0.91<br>(-1.92~0.10)        | -0.50<br>(-1.42~0.43)     | -0.02<br>(-1.86~1.82)        | -1.17*<br>(-2.09~-0.25)      | -0.26<br>(-0.74~0.22)     |
| Education (years)                   | 0.06<br>(-0.06~0.18)         | -0.07<br>(-0.17~0.04)     | 0.04<br>(-0.17~0.25)         | 0.01<br>(-0.10~0.11)         | -0.002<br>(-0.06~0.05)    |
| AGE (years)                         | 0.09***<br>(0.05~0.14)       | -0.03<br>(-0.07~0.01)     | -0.03<br>(-0.11~0.05)        | 0.12***<br>(0.08~0.16)       | 0.09***<br>(0.07~0.11)    |
| <i>Time-varying covariates</i>      |                              |                           |                              |                              |                           |
| Living with the spouse <sup>¶</sup> | 3.19***<br>(1.86~4.53)       | 2.96***<br>(1.74~4.17)    | 5.33***<br>(2.91~7.75)       | 2.89***<br>(1.68~4.11)       | 1.77***<br>(1.14~2.40)    |
| Tobacco smoking (yes)               | 0.38<br>(-0.89~1.66)         | 0.09<br>(-1.07~1.26)      | -1.54<br>(-3.86~0.77)        | 0.77<br>(-0.39~1.93)         | 0.06<br>(-0.54~0.67)      |
| Betel-nut chewing (yes)             | 1.12<br>(-1.46~3.70)         | -1.52<br>(-3.88~0.85)     | -3.22<br>(-7.92~1.48)        | 0.97<br>(-1.37~3.32)         | -0.32<br>(-1.55~0.91)     |
| Psychiatric disorder <sup>¶</sup>   | -11.19***<br>(-12.17~-10.22) | -7.95***<br>(-8.84~-7.06) | -16.71***<br>(-18.49~-14.93) | -12.11***<br>(-13.00~-11.23) | -6.17***<br>(-6.64~-5.71) |
| # of chronic diseases <sup>†</sup>  | -0.28<br>(-0.59~0.03)        | -0.33*<br>(-0.61~-0.04)   | -0.71*<br>(-1.27~-0.15)      | -0.05<br>(-0.33~0.23)        | 0.09<br>(-0.05~0.24)      |

|                                      |                           |                           |                           |                           |                           |
|--------------------------------------|---------------------------|---------------------------|---------------------------|---------------------------|---------------------------|
| # of Medications <sup>‡</sup>        | -4.76***<br>(-5.93~-3.59) | -4.84***<br>(-5.90~-3.77) | -6.52***<br>(-8.64~-4.39) | -4.83***<br>(-5.90~-3.77) | -2.42***<br>(-2.97~-1.86) |
| Regular exercise status <sup>¶</sup> |                           |                           |                           |                           |                           |
| ≥ 300 minutes                        | 8.97***<br>(7.24~10.70)   | 3.16***<br>(1.58~4.74)    | 4.08*<br>(0.94~7.22)      | 5.04***<br>(3.47~6.62)    | 2.03***<br>(1.21~2.85)    |
| 150-299 minutes                      | 6.12***<br>(4.24~8.00)    | 3.57***<br>(1.87~5.27)    | 4.02*<br>(0.62~7.42)      | 2.89**<br>(1.18~4.61)     | 1.55**<br>(0.65~2.44)     |
| < 150 minutes                        | 3.62***<br>(2.14~5.11)    | 1.89**<br>(0.53~3.25)     | 0.76<br>(-1.94~3.47)      | 1.73*<br>(0.38~3.09)      | 0.65<br>(-0.06~1.36)      |
| Ineffective exercise                 | 3.85***<br>(2.86~4.83)    | 1.53**<br>(0.63~2.43)     | 2.26*<br>(0.47~4.05)      | 2.04***<br>(1.15~2.94)    | 0.87***<br>(0.40~1.33)    |
| For time slope                       |                           |                           |                           |                           |                           |
| Time (years) <sup>§</sup>            | 3.32**<br>(0.87~5.77)     | 3.00**<br>(0.89~5.10)     | 8.04***<br>(3.97~12.11)   | 1.15<br>(-1.06~3.36)      | 1.49**<br>(0.37~2.62)     |
| Time <sup>2</sup> (years)            | -0.12<br>(-0.41~0.18)     | -0.17<br>(-0.43~0.09)     | -0.66*<br>(-1.17~-0.16)   | -0.12<br>(-0.39~0.14)     | -0.05<br>(-0.19~0.08)     |
| Gender (female) <sup>¶</sup>         | -0.06<br>(-0.70~0.58)     | 0.16<br>(-0.39~0.70)      | -0.87<br>(-1.93~0.18)     | -0.38<br>(-0.95~0.20)     | -0.14<br>(-0.43~0.15)     |
| Education (years)                    | -0.07<br>(-0.14~0.01)     | -0.01<br>(-0.08~0.05)     | -0.09<br>(-0.22~0.03)     | 0.02<br>(-0.05~0.09)      | -0.01<br>(-0.05~0.02)     |
| AGE (years)                          | -0.02<br>(-0.04~0.01)     | -0.02<br>(-0.05~0.003)    | -0.04<br>(-0.09~0.01)     | 0.004<br>(-0.02~0.03)     | -0.005<br>(-0.02~0.01)    |
| <i>Time-varying covariates</i>       |                           |                           |                           |                           |                           |
| Living with the spouse <sup>¶</sup>  | -0.79<br>(-1.59~0.02)     | -0.38<br>(-1.09~0.32)     | -1.47*<br>(-2.84~-0.11)   | -0.44<br>(-1.17~0.29)     | -0.40*<br>(-0.77~-0.03)   |

|                                      |                       |                         |                       |                        |                        |
|--------------------------------------|-----------------------|-------------------------|-----------------------|------------------------|------------------------|
| Tobacco smoking (yes)                | -0.34<br>(-1.19~0.51) | -0.01<br>(-0.74~0.72)   | 0.22<br>(-1.20~1.63)  | -0.49<br>(-1.26~0.27)  | -0.15<br>(-0.54~0.24)  |
| Betel-nut chewing (yes)              | 1.06<br>(-0.90~3.01)  | 1.64<br>(-0.07~3.34)    | 1.35<br>(-1.96~4.66)  | 1.59<br>(-0.17~3.36)   | 0.69<br>(-0.21~1.59)   |
| Psychiatric disorder <sup>¶</sup>    | 0.01<br>(-0.61~0.62)  | 0.03<br>(-0.51~0.57)    | 0.27<br>(-0.78~1.32)  | 0.60*<br>(0.04~1.16)   | 0.19<br>(-0.09~0.48)   |
| # of 15 diseases <sup>†</sup>        | -0.07<br>(-0.26~0.11) | -0.12<br>(-0.28~0.04)   | -0.26<br>(-0.57~0.06) | -0.07<br>(-0.24~0.10)  | -0.08<br>(-0.17~0.005) |
| # of Medications <sup>‡</sup>        | 0.15<br>(-0.55~0.86)  | 0.51<br>(-0.11~1.13)    | -0.02<br>(-1.23~1.19) | -0.03<br>(-0.67~0.61)  | 0.10<br>(-0.22~0.43)   |
| Regular exercise status <sup>¶</sup> |                       |                         |                       |                        |                        |
| $\geq 300$ minutes                   | 0.07<br>(-0.94~1.08)  | 0.12<br>(-0.76~1.01)    | -0.61<br>(-2.33~1.11) | -0.07<br>(-0.98~0.84)  | 0.001<br>(-0.46~0.47)  |
| 150-299 minutes                      | -0.03<br>(-1.12~1.05) | -0.64<br>(-1.59~0.32)   | -0.18<br>(-2.04~1.69) | -0.003<br>(-0.99~0.98) | -0.11<br>(-0.62~0.39)  |
| < 150 minutes                        | -0.17<br>(-1.08~0.74) | -0.92*<br>(-1.72~-0.12) | -0.13<br>(-1.69~1.43) | -0.06<br>(-0.88~0.76)  | -0.12<br>(-0.54~0.30)  |
| Ineffective exercise                 | 0.23<br>(-0.37~0.83)  | -0.05<br>(-0.57~0.48)   | 0.17<br>(-0.86~1.19)  | 0.12<br>(-0.42~0.66)   | 0.07<br>(-0.20~0.35)   |

***Random effects***

|                   |          |          |          |          |          |
|-------------------|----------|----------|----------|----------|----------|
| Variance (Wave 1) | 294.5*** | 249.0*** | 989.8*** | 243.5*** | 65.81*** |
| Variance (Wave 2) | 223.5*** | 200.5*** | 750.9*** | 186.1*** | 48.30*** |
| Variance (Wave 3) | 227.6*** | 173.7*** | 740.6*** | 188.0*** | 47.63*** |
| Variance (Wave 4) | 190.5*** | 152.8*** | 579.0*** | 155.6*** | 37.01*** |
| Variance (Time)   | 15.9***  | 6.4***   | 16.6***  | 12.1***  | 2.80***  |

|      |          |          |          |          |          |
|------|----------|----------|----------|----------|----------|
| -2LL | 124994.8 | 120934.8 | 141107.9 | 121958.0 | 100337.1 |
| AIC  | 125004.8 | 120944.8 | 141117.9 | 121968.0 | 100347.1 |
| BIC  | 125042.8 | 120982.7 | 141155.9 | 122006.0 | 100385.0 |

\* $p < 0.05$ ; \*\* $p < 0.01$ ; \*\*\* $p < 0.001$

<sup>§</sup>Time interval between two adjacent waves

<sup>†</sup>Self-reported and/or diagnosed chronic diseases, including T2DM, hypertension, hyperlipidemia, kidney disease, cardiac disease, stroke, hepatic disease, gout, osteoporosis, asthma, psychiatric disease, nerve-related disease, intestinal disease, Tuberculosis, and metabolic syndrome

<sup>‡</sup>4 pills, including refreshing drugs, sleeping pills, sedative medicine, and painkiller

<sup>¶</sup>The reference group: gender (male), age ( $\geq 65$  years old), marital status (living alone), psychiatric disorder (CHQ-12  $< 4$ ), exercise status (no exercise)

*Abbreviations:* HRQOL, health-related quality of life; VT, vitality; SF, social functioning; RE, role emotional; MH, mental health; MCS, mental component summary; T2DM, type 2 Diabetes mellitus; -2LL, -2 restricted log-likelihood; AIC, Akaike's information criterion; BIC, Schwarz's Bayesian criterion
