# Supplementary material for: Regular exercise and the trajectory of health-related quality of life among Taiwanese adults: a cohort study analysis 2006–2014
Source: Springer Nature journal article supplement (doi:10.1186/s12889-019-7662-8), 2019-10-23
Supplement: MOESM3 [file 17303294]

**Additional file 3** Comparisons between non-participation and participation at Wave2 – Wave4 by predictors at baseline

| Covariates                     | Wave 2 (N = 6,154) |           |                 | Wave 3 (N = 6,110) |           |                 | Wave 4 (N = 6,022) |           |                 |
|--------------------------------|--------------------|-----------|-----------------|--------------------|-----------|-----------------|--------------------|-----------|-----------------|
|                                | non-Part.          | Part.     | <i>p</i> -value | non-Part.          | Part.     | <i>p</i> -value | non-Part.          | Part.     | <i>p</i> -value |
|                                | (n=1,886)          | (n=4,268) |                 | (n=2,686)          | (n=3,424) |                 | (n=3,615)          | (n=2,407) |                 |
|                                | %/Mean             | %/Mean    |                 | %/Mean             | %/Mean    |                 | %/Mean             | %/Mean    |                 |
| Gender                         |                    |           |                 |                    |           |                 |                    |           |                 |
| Female                         | 53.6%              | 55.4%     | 0.188           | 52.6%              | 56.4%     | 0.003           | 53.7%              | 56.3%     | 0.047           |
| Male                           | 46.4%              | 44.6%     |                 | 47.4%              | 43.6%     |                 | 46.3%              | 43.7%     |                 |
| Age (years)                    | 54.99              | 52.82     | <0.001          | 54.75              | 52.46     | <0.001          | 54.00              | 52.68     | <0.001          |
| 30 ~ 64                        | 75.0%              | 82.5%     | <0.001          | 75.3%              | 84.1%     | <0.001          | 77.8%              | 83.9%     | <0.001          |
| ≥ 65                           | 25.0%              | 17.5%     |                 | 24.7%              | 15.9%     |                 | 22.2%              | 16.1%     |                 |
| Education (years)              | 9.24               | 10.44     | <0.001          | 9.61               | 10.48     | <0.001          | 9.88               | 10.44     | <0.001          |
| No schooling                   | 13.1%              | 6.4%      | <0.001          | 11.4%              | 6.0%      | <0.001          | 10.2%              | 5.5%      | <0.001          |
| below Senior HS                | 41.1%              | 38.0%     |                 | 39.7%              | 38.1%     |                 | 38.9%              | 38.5%     |                 |
| Senior HS                      | 27.7%              | 32.1%     |                 | 28.5%              | 32.7%     |                 | 28.5%              | 34.6%     |                 |
| above Senior HS                | 18.1%              | 23.5%     |                 | 20.5%              | 23.2%     |                 | 22.4%              | 21.5%     |                 |
| Marital status                 |                    |           |                 |                    |           |                 |                    |           |                 |
| Living with spouse             | 85.7%              | 90.4%     | <0.001          | 86.9%              | 90.5%     | <0.001          | 87.4%              | 91.0%     | <0.001          |
| Single                         | 14.3%              | 9.6%      |                 | 13.1%              | 9.5%      |                 | 12.6%              | 9.0%      |                 |
| Tobacco smoking (Yes)          | 21.6%              | 16.4%     | <0.001          | 21.1%              | 15.5%     | <0.001          | 19.5%              | 15.6%     | <0.001          |
| Betel-nuts chewing (Yes)       | 4.7%               | 2.5%      | <0.001          | 4.2%               | 2.4%      | <0.001          | 3.9%               | 2.1%      | <0.001          |
| Psychiatric status (by CHQ-12) | 3.05               | 2.95      | 0.040           | 2.98               | 2.99      | 0.825           | 2.97               | 3.00      | 0.462           |

|                         |       |       |        |       |       |        |       |       |        |
|-------------------------|-------|-------|--------|-------|-------|--------|-------|-------|--------|
| Normal                  | 70.4% | 75.2% | <0.001 | 73.3% | 74.0% | 0.563  | 73.4% | 74.3% | 0.421  |
| Psychiatric disorder*   | 29.6% | 24.8% |        | 26.7% | 26.0% |        | 26.6% | 25.7% |        |
| # of 15 diseases†       | 1.79  | 1.54  | <0.001 | 1.77  | 1.49  | <0.001 | 1.72  | 1.45  | <0.001 |
| # of 4 Pills taken‡     | 0.09  | 0.10  | 0.669  | 0.10  | 0.10  | 0.669  | 0.10  | 0.09  | 0.667  |
| Regular exercise status |       |       |        |       |       |        |       |       |        |
| No exercise             | 43.1% | 34.3% | <0.001 | 41.6% | 33.3% | <0.001 | 39.5% | 33.0% | <0.001 |
| Irregular exercise      | 37.8% | 40.9% |        | 39.3% | 40.6% |        | 39.6% | 40.7% |        |
| < 150 minutes           | 8.2%  | 11.2% |        | 8.9%  | 11.5% |        | 9.0%  | 12.4% |        |
| 150~299 minutes         | 5.0%  | 6.1%  |        | 4.7%  | 6.6%  |        | 5.3%  | 6.4%  |        |
| ≥ 300 minutes           | 5.8%  | 7.5%  |        | 5.6%  | 8.1%  |        | 6.6%  | 7.6%  |        |
| PCS score               | 52.25 | 53.38 | <0.001 | 52.41 | 53.52 | <0.001 | 52.69 | 53.56 | <0.001 |
| MCS score               | 49.52 | 49.70 | 0.492  | 49.67 | 49.64 | 0.920  | 49.45 | 50.00 | 0.024  |
| Attrition               |       |       |        |       |       |        |       |       |        |
| Died                    |       | 21    |        |       | 48    |        |       | 88    |        |
| Lost to follow-up       |       | 7     |        |       | 24    |        |       | 72    |        |

\* CHQ-12 score  $\geq 4$

† 15 self-reported and/or diagnosed chronic diseases, including T2DM, hypertension, hyperlipidemia, kidney disease, cardiac disease, stroke, hepatic disease, gout, osteoporosis, asthma, psychiatric disease, nerve-related disease, intestinal disease, Tuberculosis, and metabolic syndrome

‡ 4 pills, including refreshing drugs, sleeping pills, sedative medicine, and painkiller

Abbreviations: PCS, physical component summary; MCS, mental component summary; T2DM, type 2 Diabetes mellitus; non-Part., non-Participation; Part., Participation
