# Supplementary material for: Regular exercise and the trajectory of health-related quality of life among Taiwanese adults: a cohort study analysis 2006–2014
Source: BMC Public Health. 2019 Oct 23;19:1352. doi: 10.1186/s12889-019-7662-8 (PMC6806516; doi:10.1186/s12889-019-7662-8)
Supplement: Supplementary file 1 — Additional file 1. Missing data information of HRQOL and covariates at 4 waves. [file 12889_2019_7662_MOESM1_ESM.pdf]

**Additional file 1** Missing data information of HRQOL and covariates at 4 waves

|                                 | Wave 1     | Wave 2     | Wave 3     | Wave 4     |
|---------------------------------|------------|------------|------------|------------|
|                                 | (N = 6182) | (N = 4268) | (N = 3424) | (N = 2407) |
| PCS score <sup>*</sup>          | 53.0±7.3   | 53.6±6.8   | 53.4±7.1   | 53.2±7.1   |
| Missing (%)                     | 8.6        | 4.8        | 1.9        | 0.9        |
| MCS score <sup>*</sup>          | 49.7±8.8   | 50.6±8.3   | 50.9±8.3   | 52.2±8.1   |
| Missing (%)                     | 8.6        | 4.8        | 1.9        | 0.9        |
| <i>Time-constant covariates</i> |            |            |            |            |
| Gender                          |            |            |            |            |
| Female (%)                      | 54.7       |            |            |            |
| Male (%)                        | 45.3       |            |            |            |
| Missing (%)                     | 0.0        |            |            |            |
| Age <sup>*</sup> (years)        | 53.5±13.1  |            |            |            |
| 30-64 years (%)                 | 80.2       |            |            |            |
| ≥ 65 years (%)                  | 19.8       |            |            |            |
| Missing (%)                     | 0.0        |            |            |            |
| Education (years) <sup>*</sup>  | 10.1±4.7   |            |            |            |
| Missing (%)                     | 1.6        |            |            |            |
| <i>Time-varying covariates</i>  |            |            |            |            |
| Time (years) <sup>*,§</sup>     | 0±0        | 2.1±0.3    | 1.9±0.9    | 2.9±0.5    |
| Marital status                  |            |            |            |            |
| Lived with a spouse (%)         | 84.7       | 88.4       | 86.5       | 86.2       |
| Lived alone (%)                 | 10.5       | 10.4       | 12.3       | 12.2       |
| Missing (%)                     | 4.8        | 1.2        | 1.3        | 1.6        |
| Tobacco smoking (yes)           |            |            |            |            |
| No (%)                          | 78.5       | 85.4       | 87.8       | 88.8       |
| Yes (%)                         | 17.2       | 13.9       | 11.3       | 10.9       |
| Missing (%)                     | 4.3        | 0.7        | 0.8        | 0.2        |
| Alcohol drinking (yes)          |            |            |            |            |
| No (%)                          | 83.4       | 89.9       | 93.3       | 94.3       |
| Yes (%)                         | 11.8       | 8.1        | 5.1        | 5.0        |
| Missing (%)                     | 4.8        | 2.0        | 1.6        | 0.7        |
| Betel-nut chewing (yes)         |            |            |            |            |

|                                      |         |         |         |         |
|--------------------------------------|---------|---------|---------|---------|
| No (%)                               | 92.5    | 97.3    | 97.8    | 98.7    |
| Yes (%)                              | 3.1     | 2.0     | 1.4     | 1.0     |
| Missing (%)                          | 4.5     | 0.8     | 0.8     | 0.3     |
| Psychiatric disorder                 |         |         |         |         |
| CHQ-12 < 4 (%)                       | 69.2    | 75.7    | 79.5    | 81.8    |
| CHQ-12 ≥ 4 (%)                       | 24.7    | 20.8    | 18.5    | 17.0    |
| Missing (%)                          | 6.1     | 3.5     | 2.0     | 1.2     |
| # of chronic diseases <sup>*,†</sup> | 1.6±1.4 | 1.7±1.5 | 2.0±1.5 | 2.0±1.5 |
| Missing (%)                          | 0.0     | 0.0     | 0.0     | 0.0     |
| # of Medications <sup>*,‡</sup>      | 0.1±0.4 | 0.1±0.3 | 0.1±0.4 | 0.1±0.4 |
| Missing (%)                          | 6.5     | 3.8     | 1.1     | 0.4     |
| Regular exercise status              |         |         |         |         |
| No exercise (%)                      | 34.6    | 34.2    | 37.8    | 36.6    |
| Ineffective exercise (%)             | 37.5    | 40.3    | 37.2    | 35.1    |
| < 150 minutes (%)                    | 9.7     | 9.6     | 9.5     | 9.5     |
| 150-299 minutes (%)                  | 5.4     | 5.7     | 6.7     | 8.1     |
| ≥ 300 minutes (%)                    | 6.6     | 6.7     | 7.2     | 10.2    |
| Missing (%)                          | 6.2     | 3.4     | 1.6     | 0.5     |

\*Mean±SD (standard deviation)

§Time interval between two adjacent waves

†Self-reported and/or diagnosed chronic diseases, including T2DM, hypertension, hyperlipidemia, kidney disease, cardiac disease, stroke, hepatic disease, gout, osteoporosis, asthma, psychiatric disease, nerve-related disease, intestinal disease, Tuberculosis, and metabolic syndrome

‡4 pills, including refreshing drugs, sleeping pills, sedative medicine, and painkiller

*Abbreviations:* HRQOL, health-related quality of life; PCS, physical component summary; MCS, mental component summary; CHQ-12, 12-item Chinese Health Questionnaire; T2DM, type 2 Diabetes mellitus
